# Supplementary material
Source: PubMed Central journal article supplement (PMC8751807)
Supplement: glab080_suppl_supplementary_material.pdf [file glab080_suppl_supplementary_material.pdf]

1 **eFigure1.** CONSORT diagram.  
2  
3

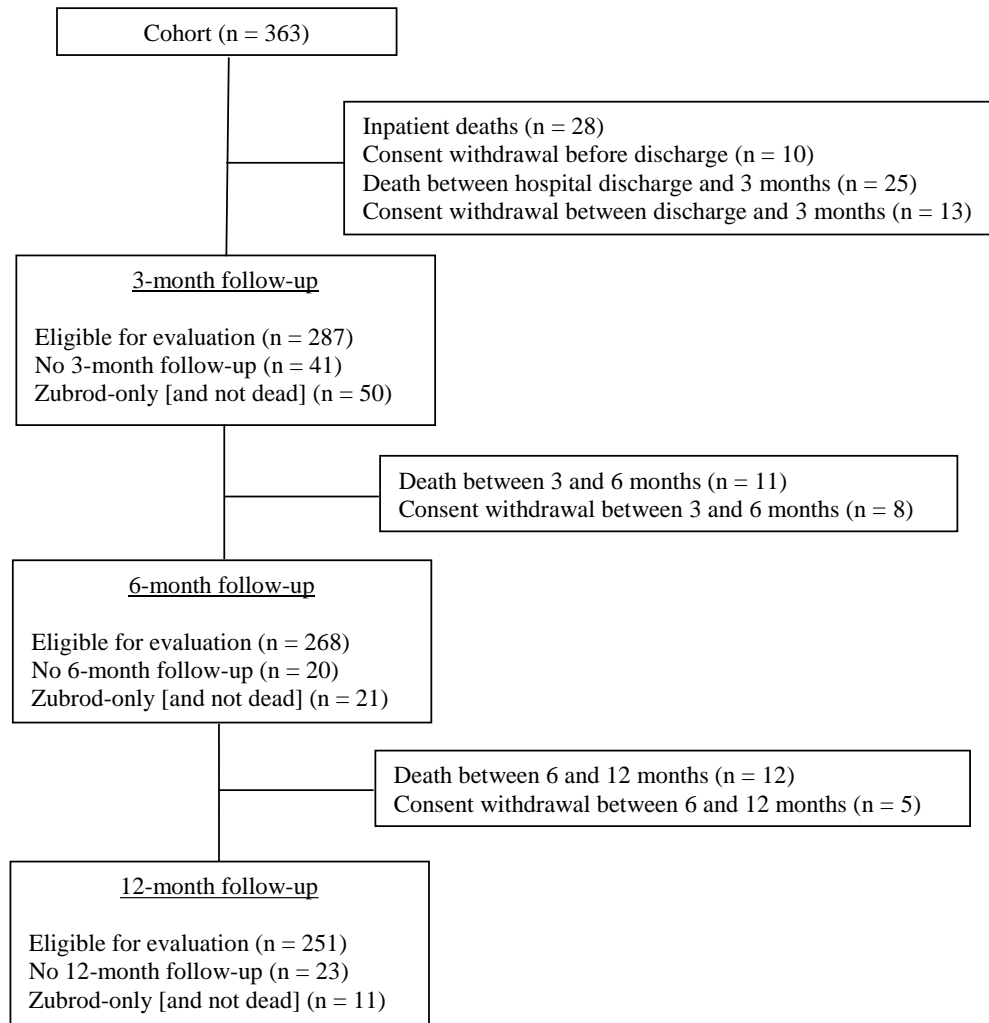

47 **eTable1.** Description of the biomarkers used in this study.

| Biomarker type                                 | Role                                                                                                                                                                                                          | Category          | Cell source                                                     | Healthy Controls Median (25th-75th)    |
|------------------------------------------------|---------------------------------------------------------------------------------------------------------------------------------------------------------------------------------------------------------------|-------------------|-----------------------------------------------------------------|----------------------------------------|
| Interleukin-6 (IL-6) [1]                       | Prototypic pro-inflammatory cytokine that is secreted in response to pathogen-associated molecular patterns (PAMPS). Cytokine that has an inhibitory effect on TNF $\alpha$ and IL-1 and activation of IL-10. | Inflammation      | Macrophages, adipocytes and myocytes                            | 5 (4, 8) pg/ml <sup>b</sup>            |
| Interleukin-8 (IL-8) [2]                       | Chemokine, induces neutrophil chemotaxis to the infection site where it stimulates phagocytosis.                                                                                                              | Inflammation      | Macrophages, endothelial and epithelial cells                   | 7 (5, 8) pg/ml <sup>b</sup>            |
| Monocyte chemoattractant protein 1 (MCP-1) [3] | Induces chemotaxis, mainly of monocytes.                                                                                                                                                                      | Inflammation      | Monocytes, macrophages and dendritic cells                      | 282 (234, 313) pg/ml <sup>b</sup>      |
| C-reactive protein (CRP) [4]                   | Acute-phase protein secreted in response to cytokines.                                                                                                                                                        | Inflammation      | Hepatocytes                                                     | 11.1 (5, 19.8) mg/l <sup>a</sup>       |
| soluble programmed death-ligand 1 (sPDL-1) [5] | Inhibits the function of T and B cells of producing cytokine production, indicates immunosuppression.                                                                                                         | Immunosuppression | Macrophages, T cells, B cells, epithelial and endothelial cells | 54 (48, 64) pg/ml <sup>b</sup>         |
| Absolute lymphocyte count (ALC) [6]            | Indicator of immune suppression, and lower levels are linked to recurring infections.                                                                                                                         | Immunosuppression | Lymphocytes                                                     | 1-3.2 (cells/cubic mm)                 |
| Absolute neutrophil count (ANC) [7]            | Indicator of immune suppression, and higher levels are linked to sepsis severity.                                                                                                                             | Immunosuppression |                                                                 | 1.7-7 (cells/cubic mm)                 |
| Interleukin-10 (IL-10) [8]                     | Produced by immune cells, inhibits the production of pro-inflammatory cytokines.                                                                                                                              | Immunosuppression | Monocytes                                                       | 17.4 (10.9, 33.2) (pg/ml) <sup>b</sup> |
| Glucagon-like peptide-1 (GLP-1) [9]            | Peptide hormone with anti-inflammatory properties, and GLP- 1 increase is mediated by excretion of IL-6, and is associated with severity of sepsis.                                                           | Stress metabolism | intestinal enteroendocrine L-cells                              | 0-15 (pM)                              |
| Albumin [10-11]                                | Transports hormones, bilirubin and fatty acids, maintains oncotic pressure. Constitutive protein of which production is decreased during an acute stress response.                                            | Stress metabolism | Hepatocytes                                                     | 3.4-5.4 (g/dl)                         |

|                                                                    |                                                                                                                                                                                              |              |                                                          |                                              |
|--------------------------------------------------------------------|----------------------------------------------------------------------------------------------------------------------------------------------------------------------------------------------|--------------|----------------------------------------------------------|----------------------------------------------|
| Insulin-like growth factor 1 (IGF-1) [12]                          | Regulates cell metabolism, growth, proliferation and apoptosis in multiple organ systems. IGF-1 is abundant in the circulation and binds to IGFB.                                            | Catabolism   | Hepatocytes                                              | 59.6 (44.9, 71.4) (ng/ml) <sup>b</sup>       |
| Insulin-like growth factor binding protein (IGFBP-3) [13]          | Is a circulating carrier of IGF-1 and regulates its biological effects by sequestering IGF-1 into a circulating reservoir, and thus reduces the free fraction of bioactive IGF in the blood. | Catabolism   | Hepatocytes                                              | 2000.7 (1537.9, 2215.3) (ng/ml) <sup>b</sup> |
| Soluble vascular endothelial growth factor receptor-1 (Flt-1) [14] | Modulates endothelial cell proliferation, inhibits angiogenesis and upregulates VEGF.                                                                                                        | Angiogenesis | Endothelial cells                                        | 77 (64.1, 80.3) (pg/ml) <sup>c</sup>         |
| Vascular endothelial growth factor (VEGF) [14]                     | Promotes angiogenesis, proliferation, migration and survival of endothelial cells, and contributes to inflammation and coagulation.                                                          | Angiogenesis | Macrophages, platelets, keratinocytes, endothelial cells | 391.4 (206.4, 571.9) (pg/ml) <sup>c</sup>    |
| Angiopoietin 2 (Ang2) [14]                                         | Growth factor regulated by inflammatory signaling. Promotes angiogenesis in the presence of VEGF, and can potentiate apoptosis in the absence of vascular endothelial growth factor.         | Angiogenesis | Endothelial cells                                        | 1709 (1405, 2356) (ng/mL) <sup>c</sup>       |
| Interferon gamma-induced protein 10 (IP-10) [15]                   | Chemokine induces chemotaxis, mainly of monocytes/macrophages, T cells and dendritic cells; Inhibits angiogenesis.                                                                           | Inflammation | Monocytes and endothelial cells                          | 303.82 (247.02, 528.8) pg/ml <sup>b</sup>    |

48  
49  
50  
51  
52  
53  
54  
55  
56  
57  
58

59 **eTable2.** Updated baseline demographics and predisposition characteristics of by age  
60 groups.

| <b>Age Groups<br/>n (%)</b>                  | <b>Young<br/>75 (21%)</b>      | <b>Middle-aged<br/>143 (39%)</b> | <b>Older<br/>145 (40%)</b> |
|----------------------------------------------|--------------------------------|----------------------------------|----------------------------|
| Male, n (%)                                  | 39 (52)                        | 76 (53)                          | 81 (56)                    |
| Age in years, median (IQR 25th, 75th)        | 36 (28, 43) <sup>a,b</sup>     | 58 (53, 62) <sup>c</sup>         | 72 (69, 76)                |
| Race, n (%)                                  |                                |                                  |                            |
| Caucasian (White)                            | 67 (89)                        | 124 (87)                         | 133 (92)                   |
| African American                             | 7 (9)                          | 18 (13)                          | 10 (7)                     |
| American Indian                              | 1 (1)                          | 0 (0)                            | 0 (0)                      |
| Asian                                        | 0 (0)                          | 0 (0)                            | 1 (1)                      |
| Other                                        | 0 (0)                          | 1 (1)                            | 0 (0)                      |
| Unknown                                      | 0 (0)                          | 0 (0)                            | 1 (1)                      |
| Ethnicity, n (%)                             |                                |                                  |                            |
| Hispanic or Latino                           | 5 (7)                          | 4 (3)                            | 1 (1)                      |
| Not Hispanic or Latino                       | 70 (93)                        | 139 (97)                         | 144 (99)                   |
| BMI, median (25th, 75th)                     | 30.3 (25.8, 40.2) <sup>b</sup> | 29.8 (25.5, 39.1) <sup>c</sup>   | 28.3 (24.4, 34)            |
| Morbid obesity n (%)                         | 19 (25) <sup>b</sup>           | 31 (22) <sup>c</sup>             | 15 (10)                    |
| Comorbidities, n (%)                         |                                |                                  |                            |
| Hypertension                                 | 24 (32) <sup>a,b</sup>         | 88 (62) <sup>c</sup>             | 114 (79)                   |
| Coronary artery disease                      | 4 (5) <sup>b</sup>             | 24 (17) <sup>c</sup>             | 61 (42)                    |
| Diabetes                                     | 12 (16) <sup>a,b</sup>         | 56 (39)                          | 56 (39)                    |
| Chronic lung disease                         | 1 (1) <sup>a,b</sup>           | 28 (20)                          | 41 (28)                    |
| Atrial fibrillation                          | 0 (0) <sup>a,b</sup>           | 10 (7) <sup>c</sup>              | 32 (22)                    |
| Chronic renal disease                        | 4 (5) <sup>b</sup>             | 19 (13)                          | 27 (19)                    |
| Heart failure                                | 2 (3) <sup>a,b</sup>           | 15 (11)                          | 30 (21)                    |
| Peripheral artery disease                    | 4 (5) <sup>a,b</sup>           | 9 (6) <sup>c</sup>               | 31 (21)                    |
| Active cancer                                | 6 (8)                          | 26 (18)                          | 25 (17)                    |
| Prior Stroke                                 | 1 (1)                          | 13 (9)                           | 12 (8)                     |
| Substance abuse                              | 7 (9)                          | 15 (11)                          | 11 (8)                     |
| Dementia                                     | 0 (0)                          | 2 (1)                            | 6 (4)                      |
| Liver disease                                | 2 (3)                          | 6 (4)                            | 2 (1)                      |
| ESRD                                         | 1 (1)                          | 18 (13) <sup>c</sup>             | 3 (2)                      |
| Number of comorbidities (adjudicated), n (%) | <sup>a,b</sup>                 |                                  |                            |
| 0                                            | 38 (51)                        | 21 (15)                          | 6 (4)                      |
| 1                                            | 16 (21)                        | 35 (25)                          | 23 (16)                    |
| 2                                            | 17 (17)                        | 35 (25)                          | 33 (21)                    |
| ≥3                                           | 4 (5)                          | 52 (36)                          | 83 (57)                    |
| Reason for Hospital Admission, n (%)         |                                |                                  |                            |
| Planned Surgery                              | 13 (17)                        | 27 (19)                          | 29 (20)                    |
| Trauma                                       | 11 (15)                        | 14 (10)                          | 11 (8)                     |
| Active Infection                             | 48 (64)                        | 89 (62)                          | 89 (61)                    |
| Non-Infectious / Chronic Problems            | 3 (4)                          | 13 (9)                           | 16 (11)                    |
| Emergency surgery (within 24 hrs), n (%)     | 44 (59)                        | 78 (55)                          | 65 (45)                    |
| Sepsis present on admission (≤48 hrs), n (%) | 51 (68)                        | 92 (64)                          | 83 (57)                    |
| Hospital-acquired sepsis (>48 hrs), n (%)    | 24 (32)                        | 51 (36)                          | 62 (43)                    |
| Type of Infection n (%)                      |                                |                                  |                            |
| Intra- abdominal                             | 13 (17) <sup>b</sup>           | 38 (27) <sup>c</sup>             | 54 (37)                    |
| Surgical Site Infection                      | 24 (32) <sup>b</sup>           | 33 (23)                          | 27 (19)                    |
| Pneumonia                                    | 11 (15)                        | 24 (17)                          | 25 (17)                    |
| Necrotizing Soft Tissue Infection            | 10 (13) <sup>b</sup>           | 24 (17) <sup>c</sup>             | 8 (6)                      |
| Urosepsis                                    | 10 (13)                        | 13 (9)                           | 19 (13)                    |
| Other                                        | 6 (8)                          | 9 (6)                            | 10 (7)                     |
| Catheter Related Blood Stream Infection      | 1 (1)                          | 2 (1)                            | 2 (1)                      |

|                                                   |                           |                          |             |
|---------------------------------------------------|---------------------------|--------------------------|-------------|
| Sepsis severity, n (%)                            |                           |                          |             |
| Sepsis                                            | 37 (48) <sup>a,b</sup>    | 39 (27)                  | 34 (24)     |
| Severe Sepsis                                     | 30 (40)                   | 65 (46)                  | 61 (42)     |
| Septic Shock                                      | 8 (12) <sup>a,b</sup>     | 39 (27)                  | 50 (34)     |
| APACHE II Score (24 hrs), median (IQR 25th, 75th) | 12 (7, 17) <sup>a,b</sup> | 15 (11, 22) <sup>c</sup> | 20 (16, 26) |
| SOFA score (24 hrs), median (IQR 25th, 75th)      | 6 (3, 7) <sup>a,b</sup>   | 7 (5, 9) <sup>c</sup>    | 8 (6, 10)   |
| Culture Negative                                  | 20 (27)                   | 53 (37)                  | 58 (40)     |
| Culture Positive                                  | 55 (73)                   | 90 (63)                  | 87 (60)     |
| Bacterial – gram positive                         | 10 (13)                   | 21 (15)                  | 24 (17)     |
| Bacterial – gram negative                         | 22 (29)                   | 38 (27)                  | 34 (25)     |
| Fungal                                            | 2 (3)                     | 5 (4)                    | 3 (2)       |
| Polymicrobial                                     | 21 (28) <sup>b</sup>      | 26 (18)                  | 26 (18)     |
| Sepsis Source Control Procedure, n (%)            | 56 (71)                   | 105 (73)                 | 93 (63)     |
| Invasive procedures                               | 31 (41)                   | 74 (52)                  | 72 (50)     |
| Non-invasive procedures                           | 25 (33)                   | 31 (22) <sup>c</sup>     | 21 (15)     |

BMI = Body Mass Index, IQR = Interquartile Range, APACHE II = Acute Physiology + Age + Chronic Health Evaluation, SOFA = the Sequential Organ Failure Assessment. Statistical difference was labeled as <sup>a</sup> - young vs. middle-aged, <sup>b</sup> - young vs. older adults and <sup>c</sup> - middle-aged vs. older adults, with statistical significance set at p<0.05.

61  
62  
63  
64  
65  
66  
67  
68  
69  
70  
71  
72  
73  
74  
75  
76  
77  
78  
79  
80  
81  
82  
83  
84  
85  
86  
87  
88  
89  
90  
91  
92  
93

94 **eTable3.** Hospital outcomes, clinical trajectory and discharge disposition for overall and  
 95 by age group.

| Age Groups<br>n (%)                                       | Young<br>75 (21%)           | Middle-aged<br>143 (39%) | Older<br>145 (40%) |
|-----------------------------------------------------------|-----------------------------|--------------------------|--------------------|
| Need for mechanical ventilation, n (%)                    | 40 (53) <sup>b</sup>        | 90 (63)                  | 111 (77)           |
| Ventilator free days (30 days), median (IQR 25th, 75th)   | 26 (26, 30) <sup>b</sup>    | 25 (21, 28) <sup>c</sup> | 24 (17.5, 30)      |
| ICU length of stay, median (IQR 25th, 75th)               | 5 (3, 12) <sup>b</sup>      | 7 (3, 17) <sup>c</sup>   | 9 (4, 17)          |
| Hospital free days (365 days), median (IQR 25th, 75th)    | 347 (321, 356) <sup>b</sup> | 340 (307, 354)           | 330 (68, 347)      |
| Secondary infections/patient, mean (SD)                   | 0.4 (0.8) <sup>b</sup>      | 0.5 (0.9)                | 0.6 (0.8)          |
| Secondary infections/100 hospital days, mean (SD)         | 2.4 (6.7) <sup>b</sup>      | 1.7 (3.2)                | 2.6 (4.5)          |
| AKI, n (%)                                                | 35 (47)                     | 63 (44)                  | 89 (61)            |
| KDIGO Stage 1                                             | 16 (21)                     | 34 (24)                  | 35 (24)            |
| KDIGO Stage 2                                             | 10 (13)                     | 27 (19)                  | 29 (20)            |
| KDIGO Stage 3                                             | 9 (12)                      | 15 (11)                  | 25 (17)            |
| Multiple organ failure (MOF) frequency, n (%) – by Denver | 4 (5) <sup>b</sup>          | 18 (13)                  | 31 (21)            |
| 30-day mortality, n (%)                                   | 4 (5) <sup>b</sup>          | 5 (4) <sup>c</sup>       | 24 (17)            |
| Clinical Trajectory, n (%)                                |                             |                          |                    |
| Early Death                                               | 2 (3)                       | 3 (2)                    | 9 (6)              |
| Chronic Critical Illness                                  | 15 (20) <sup>b</sup>        | 48 (34)                  | 61 (42)            |
| Rapid Recovery                                            | 58 (75) <sup>b</sup>        | 92 (64)                  | 75 (52)            |
| Discharge disposition, n (%)                              |                             |                          |                    |
| “Good” Disposition                                        | 63 (84) <sup>a,b</sup>      | 90 (63) <sup>c</sup>     | 54 (37)            |
| Home                                                      | 22 (34) <sup>b</sup>        | 30 (21) <sup>c</sup>     | 13 (10)            |
| Homecare                                                  | 36 (48) <sup>b</sup>        | 49 (34) <sup>c</sup>     | 24 (17)            |
| Rehab                                                     | 0 (0) <sup>b</sup>          | 11 (8)                   | 15 (10)            |
| “Poor” Disposition                                        | 12 (19) <sup>a,b</sup>      | 53 (37) <sup>c</sup>     | 82 (62)            |
| Long Term Care Hospital                                   | 5 (7) <sup>b</sup>          | 19 (13)                  | 30 (21)            |
| Skilled Nursing                                           | 0 (0) <sup>a,b</sup>        | 21 (15)                  | 32 (22)            |
| Another Hospital                                          | 4 (5)                       | 6 (4)                    | 3 (2)              |
| Hospice                                                   | 0 (0)                       | 2 (1)                    | 6 (4)              |
| Death                                                     | 3 (4)                       | 5 (4) <sup>c</sup>       | 20 (14)            |
| Number of readmissions, mean (SD)                         | 1 (2)                       | 1 (2)                    | 1 (1)              |

96 IQR = Interquartile Range, SD = standard deviation, KDIGO = Kidney Disease: Improving Global Outcomes. Statistical difference was  
 97 labeled as <sup>a</sup> - young vs. middle-aged, <sup>b</sup> - young vs. older adults and <sup>c</sup> - middle-aged vs. older adults, with statistical significance set at  
 98 p<0.05.  
 99

100  
 101  
 102  
 103  
 104  
 105  
 106  
 107  
 108  
 109  
 110  
 111  
 112

113  
114

**eTable4.** Long-term follow-up of physical function and cognitive status for overall and by age group.

| Age Groups<br>n (%)          |           | Young<br>75 (21%)         | Middle-aged<br>143 (39%)  | Older<br>145<br>(40%)   |            |
|------------------------------|-----------|---------------------------|---------------------------|-------------------------|------------|
| <b>Physical function</b>     |           |                           |                           |                         |            |
| Total SPPB                   |           |                           |                           |                         |            |
|                              | 3 months  | 8.0 ± 0.9 <sup>b</sup>    | 5.4 ± 0.6 <sup>c</sup>    | 3.3 ± 0.6               |            |
|                              | 6 months  | 8.5 ± 1.1 <sup>b</sup>    | 5.9 ± 0.7                 | 3.4 ± 0.7               |            |
|                              | 12 months | 8.1 ± 1.5                 | 5 ± 0.9                   | 5.1 ± 1.1               |            |
| Handgrip strength            |           |                           |                           |                         |            |
|                              | 3 months  | 30.6 ± 2.3 <sup>a,b</sup> | 20.8 ± 2.4                | 27.2 ± 5.0              |            |
|                              | 6 months  | 47.6 ± 6.0 <sup>a,b</sup> | 25.5 ± 1.3                | 23 ± 1.1                |            |
|                              | 12 months | 38 ± 2.4 <sup>a,b</sup>   | 27.6 ± 1.4 <sup>c</sup>   | 18.9 ± 2.2              |            |
| <b>Cognitive function</b>    |           |                           |                           |                         |            |
| Hopkins Verbal Learning Test |           |                           |                           |                         |            |
|                              | 3 months  |                           |                           |                         |            |
|                              |           | Total recall              | 25.8 ± 1.0 <sup>a,b</sup> | 20.8 ± 1.0              | 18.7 ± 0.9 |
|                              |           | Delayed recall            | 9.5 ± 0.5 <sup>a,b</sup>  | 6.5 ± 0.6               | 5.4 ± 0.6  |
|                              |           | Retention                 | 91.9 ± 2.6 <sup>a,b</sup> | 73.1 ± 5.3              | 65.8 ± 6.4 |
|                              | 6 months  |                           |                           |                         |            |
|                              |           | Total recall              | 26.3 ± 0.9 <sup>a,b</sup> | 23.3 ± 0.6 <sup>c</sup> | 18.6 ± 1.6 |
|                              |           | Delayed recall            | 9.3 ± 0.4 <sup>a,b</sup>  | 8 ± 0.3 <sup>c</sup>    | 5.4 ± 0.7  |
|                              |           | Retention                 | 93 ± 1.6 <sup>b</sup>     | 86.7 ± 2.8 <sup>c</sup> | 64.1 ± 7.9 |
|                              | 12 months |                           |                           |                         |            |
|                              |           | Total recall              | 27.3 ± 0.9 <sup>a,b</sup> | 21.9 ± 1.8              | 20.8 ± 1.3 |
|                              |           | Delayed recall            | 9.7 ± 0.3 <sup>a,b</sup>  | 6.5 ± 1.1               | 6.8 ± 0.5  |
|                              |           | Retention                 | 94.5 ± 2.5 <sup>a</sup>   | 67.1 ± 10.9             | 80.9 ± 5.0 |
| COWA                         |           |                           |                           |                         |            |
|                              | 3 months  | 40.4 ± 1.9 <sup>a,b</sup> | 29.4 ± 2.2                | 28.2 ± 1.7              |            |
|                              | 6 months  | 38.1 ± 1.4 <sup>a,b</sup> | 33.7.5 ± 1.4              | 27.5 ± 1.7              |            |
|                              | 12 months | 37.4 ± 1.9 <sup>b</sup>   | 31.5 ± 5.7                | 27 ± 2.4                |            |
| MMSE                         |           |                           |                           |                         |            |
|                              | 3 months  | 90.3 ± 2.3 <sup>b</sup>   | 84.5 ± 2.7                | 82.4 ± 3.0              |            |
|                              | 6 months  | 94.8 ± 1.5 <sup>a,b</sup> | 90.1 ± 1.2 <sup>c</sup>   | 78.9 ± 2.5              |            |
|                              | 12 months | 92.5 ± 2.5 <sup>b</sup>   | 87.1 ± 4.3                | 85.4 ± 2.1              |            |

115 SPPB=short physical performance battery, COWA = Controlled Oral Word Association, MMSE = mini-mental state examination.  
 116 Statistical difference was labeled as <sup>a</sup> - young vs. middle-aged, <sup>b</sup> - young vs. older adults and <sup>c</sup> - middle-aged vs. older adults, with  
 117 statistical significance set at p<0.05.  
 118  
 119  
 120  
 121  
 122  
 123  
 124  
 125  
 126  
 127  
 128  
 129  
 130  
 131

132 **eTable5.** Amount of organ failures and ventilator use on day 14.

| Age groups<br>N (%)                               | Young<br>75 (34%) | Older<br>145 (66%) | Older RAP<br>75 (55%) | Older CCI<br>61 (45%) |
|---------------------------------------------------|-------------------|--------------------|-----------------------|-----------------------|
| Organ system dysfunction by SOFA on day 14, n (%) |                   |                    |                       |                       |
| Pulmonary                                         | 3 (4)             | 14 (10)            | 0 (0)                 | 11 (18)               |
| CNS                                               | 3 (4)             | 12 (8)             | 0 (0)                 | 7 (11)                |
| Cardiovascular                                    | 2 (3)             | 13 (9)             | 0 (0)                 | 11 (18)               |
| Renal                                             | 22 (29)           | 54 (37)            | 30 (40)               | 18 (30)               |
| Coagulation                                       | 1 (1)             | 6 (4)              | 0 (0)                 | 4 (7)                 |
| Hepatic                                           | 1 (1)             | 3 (2)              | 0 (0)                 | 2 (3)                 |
| Ventilated on day 14, n (%)                       | 2 (3)             | 17 (12)            | 0 (0)                 | 17 (28)               |

133

134

135

136

137

138 **References**

- 139 1. Remick DG, Bolgos G, Copeland S, Siddiqui J. Role of interleukin-6 in mortality from and  
140 physiologic response to sepsis. *Infect Immun.* 2005;73(5):2751-2757.
- 141 2. Hack CE, Hart M, van Schijndel RJ, et al. Interleukin-8 in sepsis: relation to shock and  
142 inflammatory mediators. *Infect Immun.* 1992;60(7):2835-2842.
- 143 3. Bossink AW, Paemen L, Jansen PM, Hack CE, Thijs LG, Van Damme J. Plasma levels of  
144 the chemokines monocyte chemoattractant protein-1 and -2 are elevated in human sepsis.  
145 *Blood.* 1995;86(10):3841-3847.
- 146 4. Povoia P, Almeida E, Moreira P, et al. C-reactive protein as an indicator of sepsis. *Intensive  
147 Care Med.* 1998;24(10):1052-1056.
- 148 5. Watanabe E, Thampy LK, Hotchkiss RS. Immunoadjuvant therapy in sepsis: novel  
149 strategies for immunosuppressive sepsis coming down the pike. *Acute Med Surg.*  
150 2018;5(4):309-315.



- 151 6. de Jager CP, van Wijk PT, Mathoera RB, de Jongh-Leuvenink J, van der Poll T, Wever PC.  
152 Lymphocytopenia and neutrophil-lymphocyte count ratio predict bacteremia better than  
153 conventional infection markers in an emergency care unit. *Crit Care*. 2010;14(5):R192.
- 154 7. Crouser ED, Parrillo JE, Seymour C, et al. Improved Early Detection of Sepsis in the ED  
155 With a Novel Monocyte Distribution Width Biomarker. *Chest*. 2017;152(3):518-526.
- 156 8. Steinhauser ML, Hogaboam CM, Kunkel SL, Lukacs NW, Strieter RM, Standiford TJ. IL-  
157 10 is a major mediator of sepsis-induced impairment in lung antibacterial host defense. *J*  
158 *Immunol*. 1999;162(1):392-399.
- 159 9. Brakenridge SC, Moore FA, Mercier NR, et al. Persistently Elevated Glucagon-Like  
160 Peptide-1 Levels among Critically Ill Surgical Patients after Sepsis and Development of  
161 Chronic Critical Illness and Dismal Long-Term Outcomes. *J Am Coll Surg*.  
162 2019;229(1):58-67 e51.
- 163 10. Weil MH, Henning RJ, Puri VK. Colloid oncotic pressure: clinical significance. *Crit Care*  
164 *Med*. 1979;7(3):113-116.
- 165 11. Stamler JS, Jaraki O, Osborne J, et al. Nitric oxide circulates in mammalian plasma  
166 primarily as an S-nitroso adduct of serum albumin. *Proc Natl Acad Sci U S A*.  
167 1992;89(16):7674-7677.
- 168 12. Elijah IE, Branski LK, Finnerty CC, Herndon DN. The GH/IGF-1 system in critical illness.  
169 *Best Pract Res Clin Endocrinol Metab*. 2011;25(5):759-767.
- 170 13. White IR. Uses and limitations of randomization-based efficacy estimators. *Stat Methods*  
171 *Med Res*. 2005;14(4):327-347.
- 172 14. Jesmin S, Zaedi S, Islam AM, et al. Time-dependent alterations of VEGF and its signaling  
173 molecules in acute lung injury in a rat model of sepsis. *Inflammation*. 2012;35(2):484-500.

174 15. Herzig DS, Luan L, Bohannon JK, Toliver-Kinsky TE, Guo Y, Sherwood ER. The role of  
175 CXCL10 in the pathogenesis of experimental septic shock. *Crit Care*. 2014;18(3):R113.

176
